# Supplementary material for: Accurate Prediction for Antibody Resistance of Clinical HIV-1 Isolates
Source: PubMed Central journal article supplement (PMC6789020; doi:10.1038/s41598-019-50635-w), 2019-10-11
Supplement: 41598_2019_50635_MOESM1_ESM.pdf [file 41598_2019_50635_MOESM1_ESM.pdf]

## **Accurate Prediction for Antibody Resistance of Clinical HIV-1 Isolates**

Reda Rawi<sup>1</sup>, Raghvendra Mall<sup>2</sup>, Chen-Hsiang Shen<sup>1</sup>, S. Katie Farney<sup>1</sup>, Andrea Shiakolas<sup>1</sup>, Jing Zhou<sup>1</sup>, Halima Bensmail<sup>2</sup>, Tae-Wook Chun<sup>3</sup>, Nicole A. Doria-Rose<sup>1</sup>, Rebecca M. Lynch<sup>4</sup>, John R. Mascola<sup>1</sup>, Peter D. Kwong<sup>1</sup> & Gwo-Yu Chuang<sup>1\*</sup>

<sup>1</sup>*Vaccine Research Center, National Institute of Allergy and Infectious Diseases, National Institutes of Health, Bethesda, 20892, MD, USA*

<sup>2</sup>*Qatar Computing Research Institute, Hamad Bin Khalifa University, Doha, 34110, Qatar*

<sup>3</sup>*Laboratory of Immunoregulation, National Institute of Allergy and Infectious Diseases, National Institutes of Health, Bethesda, 20892, MD, USA*

<sup>4</sup>*Department of Microbiology, Immunology and Tropical Medicine, George Washington University, Washington, DC, USA*

\* Corresponding author: [gwo-yu.chuang@nih.gov](mailto:gwo-yu.chuang@nih.gov)

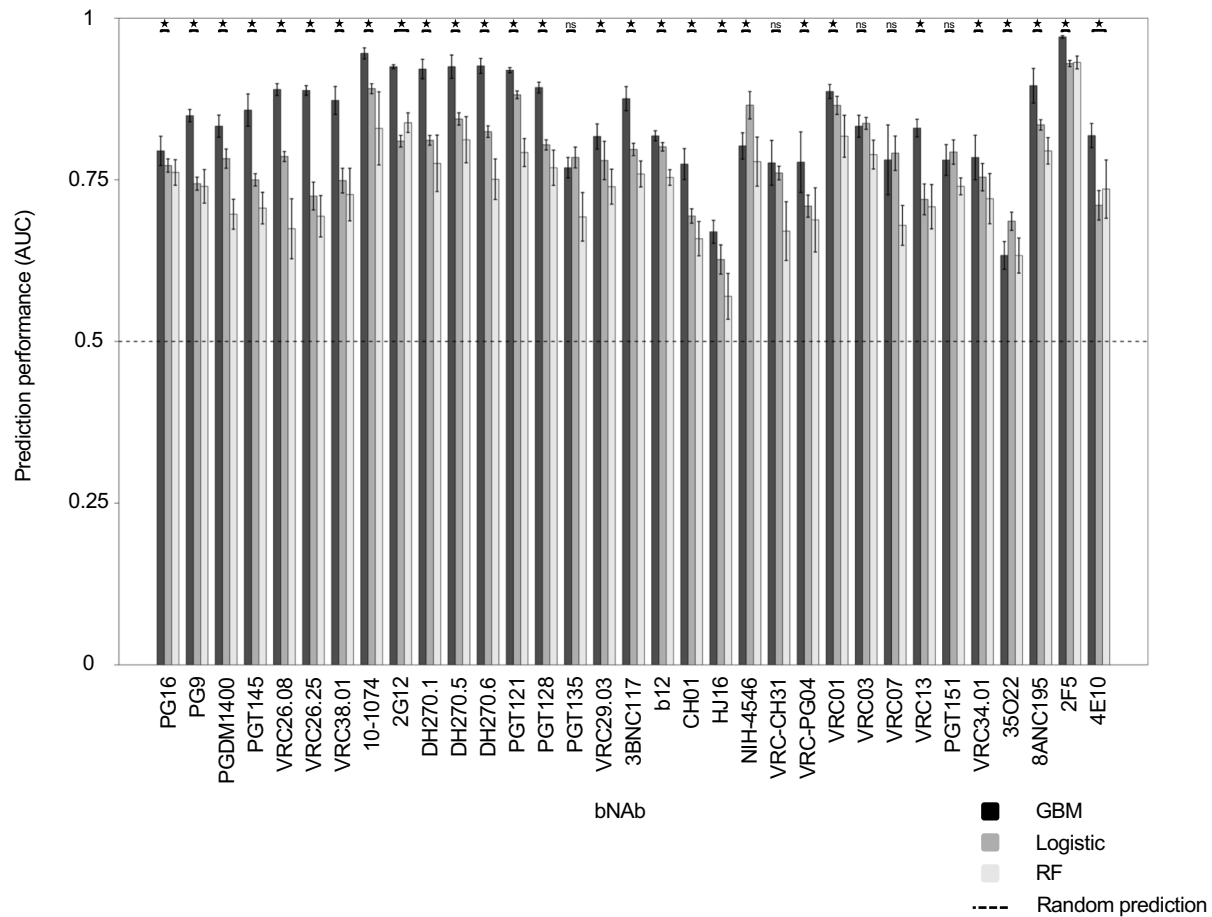

**Figure S1. Prediction performance of GBM classifiers compared to Logistic Regression and Random Forest predictors.**

Prediction performance (AUC) comparison of GBM (black bars), logistic regression (dark gray), and random forest (light gray) of 33 bNAb prediction models determined by ten runs of ten-fold cross-validation. For the sake of clarity, results from statistical significance testing are shown only for the top 2 models (\*P-value < 0.05, ns = not significant).

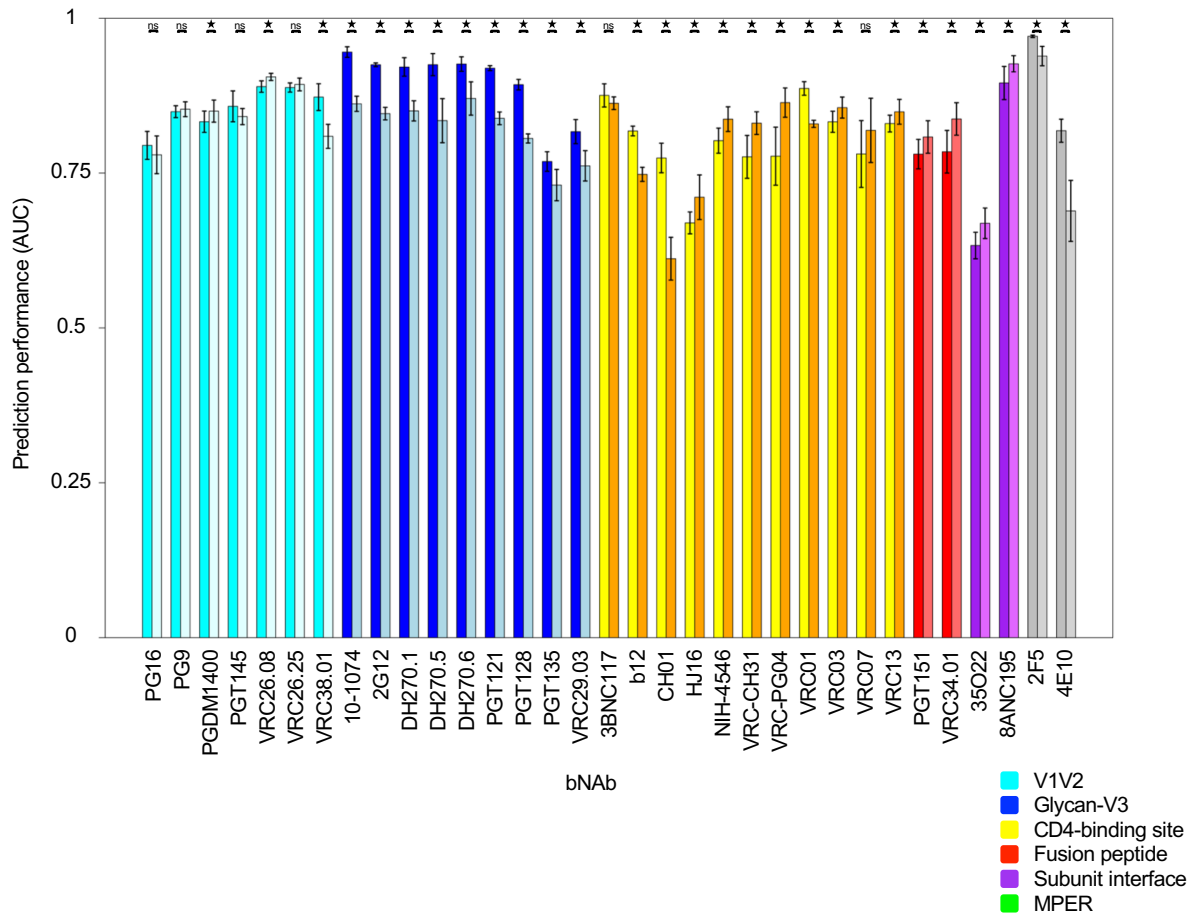

**Figure S2. Prediction performance of bNAb classifiers using sequences comprising the full Env sequences or the epitope region only.**

The prediction performance of the bNAb classifiers using full Env sequences or sequence subsets comprising epitope region only were determined by ten runs of ten-fold cross-validation and are shown as bar plots. The 33 different classifiers are shown on the x-axis, named according to the antibody they are trained on. The colors of the bars refer to the epitope category of the corresponding antibody. The left bar of each pair of bars refers to classifiers trained using full Env sequences, while the right bar refers to classifiers trained using epitope sequence subsets only.

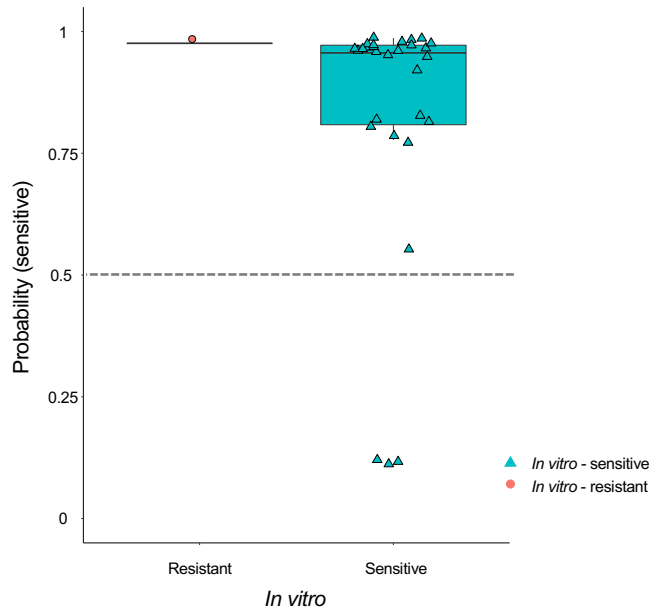

**Figure S3. Prediction performance of bNAb-ReP on Env strains from bNAb 3BNC117 treatment study.**

Prediction performance on bNAb 3BNC117 neutralization and sequence data shown as boxplot. *In vitro* assay neutralization classification is shown on the x-axis, with the *in silico* predicted probability for a sequence to be sensitive to 3BNC117 shown on the y-axis. The classification cutoff of 0.5 is depicted with a grey dashed line.

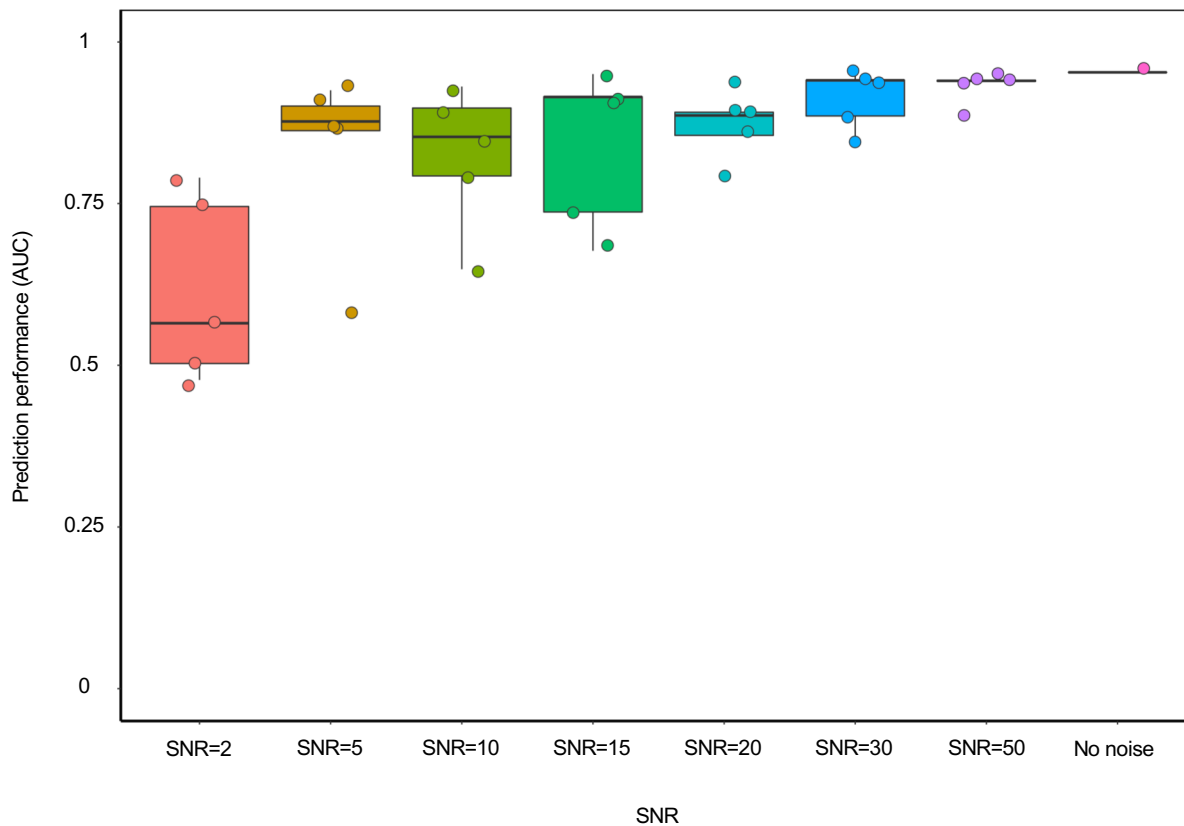

**Figure S4. Prediction performance of VRC01 bNAb-ReP with noise added to training set.** The prediction performance (AUC) of VRC01 bNAb-ReP with signal to noise ratio (SNR) = 2, 5, 10, 15, 20, 30, 50 on the Lynch et al. VRC01 test set is shown. Each SNR experiment was repeated five times.

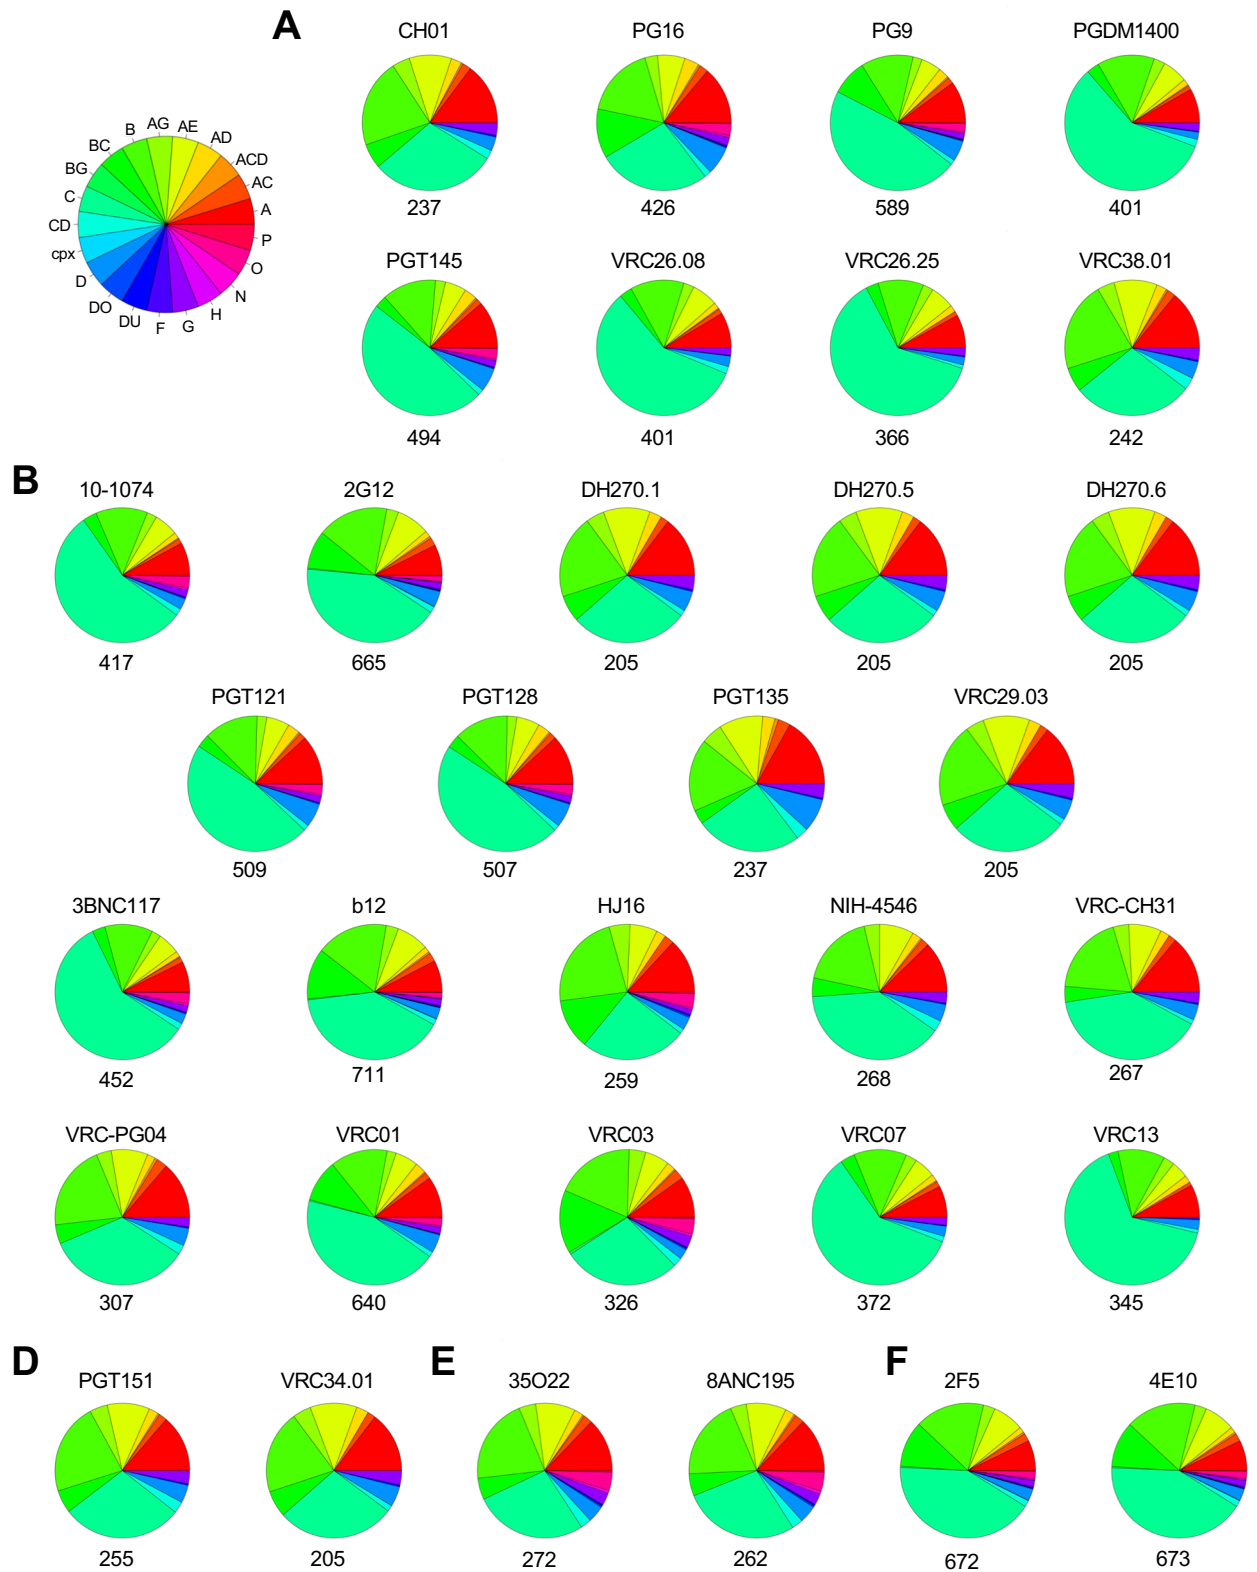

**Figure S5. Training sets clade distributions**

Clade distributions for each bNAb training set are illustrated as pie charts, with distinct epitope categories shown in (A) V1V2, (B) Glycan-V3, (C) CD4-binding site, (D) fusion peptide, (E) subunit interface, and (F) MPER. The number of strains within each training sets is depicted below the corresponding pie chart.

## Supplementary Data S1. HIV-1 Env sequences of VRC01-ATI study

>V08DA\_POVIp\_2H3.A.9

MRVRGIRKNYQRLWKWG-TLLSMLLGLLMICNAKEQLWVTVVYGVVWKEANTTLFCASD  
ARAYSTEKHNVWATHACVPTDDPDQEVKLGNTENFNMWKNMVDQMHEDIISLWDQSLK  
PCVEITPLCVTLNCTDYKGNASTN-----NSGGEMENKEEMKNCSFNITTSLSDKV-Q  
ERALFYIYDITPINN-----TTNTSYKLTRCNSSVITQACPKVSFEPPIHYCAPAGFAI  
LKCRQKNFNGTGPCTDVSTVQCTHGIRPVVSTQLLLNGLSLAEDEVVVKSENLTDNSKNI  
VQLQEAINITCTRPNNNTRKSINI--GPGRAIYATGEIIGDIRQAHCNISEEKWNKTLGQ  
IVEKLRKQFN-NKTIVFAQPSGGDPEIVMHSFNCGGEFFYCNTTRLFNSTWSTWINDS-ST  
LSNGTGNNITTLPCRICKQVINMWQKVGKAMYAPPIAGQIRCSSNITGLILTRDGG----S  
NNMSNETFRPGGGNMKNDRSELYKYKVVKIEPLGIAPTKAKRRVVQREKRAIG-IGAVF  
LGFPGAAGSTMGAASVTLTVQARQLLFGIVQQNNLLRAIEAQHLLQLTVWGIKQLQAR  
VLAVERYLKDQQLLGIWGCSSGLICTTAVPWNWSWSNKSLEQIWNMTWMQWEKEINNYT  
GLIYTLIEQSQNQQEKNEQELLELDTWASLWNWFDISKWLWYIKIFIMIVGGLIGLRIVF  
TVLSIVNVRQGYSPLSFQTRPPAQRG-PDRPEGIEEEGGERDRDRSGPLVDGFFAIWV  
DLRNLCLFIYHRLRDLILLIVTRIVELLGR-RGWEILKYWWNLLQYWRQELKNSAISLLNA  
TAIAVAEGTDRVIEVVQIRGRGILHIPVRIRQGLERALL

>V08\_DA\_PRAp\_2G2.2

MRVRGIRKNYQRLWKWG-TLLSMLLGLLMICNAKEQLWVTVVYGVVWREANTTLFCASD  
ARAYSTEKHNVWATHACVPTDDPDQEVKLGNTENFNMWKNMVDQMHEDIISLWDQSLK  
PCVEITPLCVTLNCTDYRGNNDSTN-----NSNETIVNKEEKKNCSFNITTSLSDKR-Q  
ERALFYKYDITPINN-----TTNTSYRLTRCNSSVITQACPKVSFEPPIHYCAPAGFAI  
LKCRQKNFNGTGPCTDVSTVQCTHGIRPVVSTQLLLNGLSLAEDEVVVKSESFTDNSKNI  
VQLKEAINITCTRPNNNTRKSINI--GPGRAIYATGEIIGDIRQAHCNISEEKWNKTLGQ  
IVKQLQEQFG-NKSIIFAQPAAGDPEIVMHSFNCGGEFFYCNTTRLFNSTWINDS----T  
RSNGTGNNITTLPCRICKQVINMWQKVGKAMYAPPIAGQIRCSSNITGLILTRDGG----S  
NNMSNETFRPGGGNMKNDRSELYKYKVVKIEPLGIAPTKAKRRVVQREKRAIG-IGAVF  
LGFPGAAGSTMGAASVTLTVQARQLLFGIVQQNNLLRAIEAQHLLQLTVWGIKQLQAR  
VLAVERYLKDQQLLGIWGCSSGLICTTAVPWNISWSNKSLEQIWNMTWMQWEKEINNYT  
GLIYTLIEQSQNQQEKNEQELLELDTWASLWNWFDISKWLWYIKIFIMIVGGLIGLRIVF  
TVLSIVNVRQGYSPLSFQTRPPAQRG-PDRPEGIEEEGGERDRDRSGPLVDGFFAIWV  
DLRNLCLFIYHRLRDLILLIVTRIVELLGR-RGWEILKYWWNLLQYWRQELKNSAISLLNA  
TAIAVAEGTDRVIEVVQIRGRGILHIPVRIRQGLERALL

>V08DA\_POVIp\_1H8.6

MRVRGIRKNYQRLWKWG-TLLSMLLGLLMICNAKEQLWVTVVYGVVWKEANTTLFCASD  
ARAYSTEKHNVWATHACVPTDDPDQEVKLGNTENFNMWKNMVDQMHEDIISLWDQSLK  
PCVEITPLCVTLNCTDYRGNNDSTN-----NSNETIVNKEGIKNCSFNITTSLSDKR-Q  
ERALFYKYDITPINN-----TTNTSYKLTRCNSSVITQACPKVSFEPPIHYCAPAGFAI  
LKCRQKNFNGTGPCTNVSTVQCTHGIRPVVSTQLLLNGLSLAEDEVVVKSENFTDNSKNI  
VQLKEAINITCTRPNNNTRKSINI--GPGRAIYATGEIIGDIRQAHCNISEEKWNKTLGQ  
IVEKLRKQFN-NKSIIFAQPSGGDPEIVMHSFNCGGEFFYCNTQLFNSTWINDS----T  
RSNGTGNNITTLPCRICKQVINMWQKVGKAMYAPPIAGQIRCSSNITGLILTRDGG----S  
NNMSNETFRPGGGNMKNDRSELYKYKVVKIEPLGIAPTKAKRRVVQREKRAIG-IGAVF  
LGFPGAAGSTMGAASVTLTVQARQLLFGIVQQNNLLRAIEAQHLLQLTVWGIKQLQAR  
VLAVERYLKDQQLLGIWGCSSGLICTTAVPWNISWSNKSLEQIWNMTWMQWEKEINNYT  
GLIYTLIEQSQNQQEKNEQELLELDTWASLWNWFDISKWLWYIKIFIMIVGGLIGLRIVF  
TVLSIVNVRQGYSPLSFQTRPPAQRG-PDRPEGIEEEGGERDRDRSGPLVDGFFAIWV  
DLRNLCLFIYHRLRDLILLIVTRIVELLGR-RGWEILKYWWNLLQYWRQELKNSAISLLNA  
TAIAVAEGTDRVIEVVQIRGRGILHIPVRIRQGLERALL

>V08\_DA\_PRAp\_2G9.7

MRVRGIRKNYQRLWKWG-TLLSMLLGLLMICNAKEQLWVTVVYGVVWEEANTTLFCASD  
ARAYSTEKHNVWATHACVPTDDPDQEVKLGNTENFNMWKNMVDQMHEDIISLWDQSLK  
PCVEITPLCVTLNCTDYRGNNDSTN-----NSNETIVNKEEKKNCSFNITTSLSDKV-Q  
ERALFYKYDITPINS-----TTNTSYKLTRCNSSVITQACPKVSFEPPIHYCAPAGFAI  
LKCRQKNFNGTGPCTEVSTVQCTHGIRPVVSTQLLLNGLSLAEDEVVVKSENFTDNSKNI  
VQLKEAINITCTRPNNNTRKSINI--GPGRAIYATGEIIGDIRQAHCNISEEKWNKTLGQ  
IVEKLRKQFN-NKSIIFAQPSGGDPEIVMHSFNCGGEFFYCNTTRLFNSTWINDS----T  
RSNGTGNNITTLPCRICKQVINMWQKVGKAMYAPPIAGQIRCSSNITGLILTRDGG----S  
NNMSNETFRPGGGNMKNDRSELYKYKVVKIEPLGIAPTKAKRRVVQREKRAIG-IGAVF  
LGFPGAAGSTMGAASVTLTVQARQLLFGIVQQNNLLRAIEAQHLLQLTVWGIKQLQAR  
VLAVERYLKDQQLLGIWGCSSGLICTTAVPWNASWSNKSLEQIWNMTWMQWEKEINNYT  
GLIYTLIEQSQNQQEKNEQELLELDTWASLWNWFDISKWLWYIKIFIMIVGGLIGLRIVF  
TVLSIVNVRQGYSPLSFQTRPPAQRG-PDRPEGIEEEGGERDRDRSGPLVDGFFAIWV  
DLRNLCLFIYHRLRDLILLIVTRIVELLGR-RGWEILKYWWNLLQYWRQELKNSAISLLNA  
TAIAVAEGTDRVIEVVQIRGRGILHIPVRIRQGLERALL

>V08DA\_POVIp\_1E4.1

MRVRGIRKNYQRLWKWG-TLLSMLLGLLMICNAKEQLWVTVVYGVVWKEASTTLFCASD  
ARAYSTEKHNVWATHACVPTDDPDQEVKLGNTENFNMWKNMVDQMHEDIISLWDQSLK  
PCVEITPLCVTLNCTDYRGNNDSTN-----NSNETIANKEEKKNCSFNITTSLSDKV-Q  
ERALFYMYDITPINN-----TTNTSYKLTRCNSSVITQACPKVSFEPPIHYCAPAGFAI  
LKCRQKNFNGTGPCTNVSTVQCTHGIRPVVSTQLLLNGLSLAEDEVVVKSENITDNSKNI

VQLKEAINITCTRPNNNTRKSINI--GPGRAIYATGEIIGDIRQAHNCISEEKWNETLRQ  
IVEKLQKQFG--NKSIIFAQPPAGGDPETVMHSFNCGGEFFYCNTTRLFNSTWSTWNS--ST  
LSNGTGNNITLPCRKQVINMWQKVGKAMYAPPIAGQIRCSSNITGLILTRDGG----S  
NNMSNETFRPGGGNMKNWRSELYKYKVVKIEPLGIAPTAKARRVVQREKRAIG-IGAVF  
LGFLGAAGSTMGAASVTLTVQARQLLFGIVQQNNLLRAIEAQHLLQLTVWGIKQLQAR  
VLAVERYLKDQQLMGIWGCSGKLICTTAVPWNASWSNKSLOQIWDNMTWMQWEKEINNYT  
GLIYTLIEQSQNQEKNEQELLELDTWASLWVWFDISKWLWYIKIFIMIVGGLIGLRIVF  
TVLSIVNRVRQGYSPLSFQTRPPAQRG--PDRPEGIEEEGGERDRDRSGPLVDGFFFAI IWV  
DLRNLCLFIYHRLRDLILLIVTRIVELLGR--RGWEILKYWWNLLQYWRQELKNSAISLLNA  
TAIAVAEGTDRVIEVVQIRGRGILHIPVRIRQGLERALL

>V08DA\_POVIp\_2C7.1

MRVRGIRKNYQRLWKWG--TLLSMLLGLLMICNAKEQLWVTVVYGVVWKEANTTLFCASD  
ARAYSTEKHNVWATHACVPTDPPDQEVGLGNVTENFNMWKNMVDQMHEDIISLWDQSLK  
PCVEITPLCVTLNCTDYRGNDNSTN-----NSNETIVNKEEIKNCSFNITTSLSDKV-Q  
ERALFYMYDITPINN-----TTNTSYRLTRCNSSVITQACPKVSFEPPIHYCAPAGFAI  
LKCRQKNFNGTGPCTNVSTVQCTHGIRPVVSTQLLNGLSLAEVEVVIKSENF'DNSKNI  
VQLKEAINITCTRPNNNTRKSINI--GPGRAIYATGEIIGDIRQAHNCISEGKWNKTLLGQ  
IVEKLQKQFG--NKSIIFTQPSGGDPEIVMHSFNCGGEFFYCNTTRLFNSTWNS--S  
RSNGTGNNITLPCRKQVINMWQKVGKAMYAPPIAGQIRCSSNITGLILTRDGG----S  
NNMSNETFRPGGGNMKNWRSELYKYKVVKIEPLGIAPTAKARRVVQREKRAIG-IGAVF  
LGFLGAAGSTMGAASVTLTVQARQLLFGIVQQNNLLRAIEAQHLLQLTVWGIKQLQAR  
VLAVERYLKDQQLGIWCSGKLICTTAVPWNTSWSDKSLEQIWNMTWMQWEKEINNYT  
GLIYTLIEQSQNQEKNEQELLELDTWASLWVWFDISKWLWYIKIFIMIVGGLIGLRIVF  
TVLSIVNRVRQGYSPLSFQTRPPAQRG--PDRPEGIEEEGGERDRDRSGPLVDGFFFAI IWV  
DLRNLCLFIYHRLRDLILLIVTRIVELLGR--RGWEILKYWWNLLQYWRQELKNSAISLLNA  
TAIAVAEGTDRVIEVVQIRGRGILHIPVRIRQGLERALL

>V08\_DA\_Prap\_2E12.5

MRVRGIRKNYQRLWKWG--TLLSMLLGLLMICNAKEQLWVTVVYGVVWKEANTTLFCASD  
ARAYSTEKHNVWATHACVPTDPPDQEVGLGNVTENFNMWKNMVDQMHEDIISLWDQSLK  
PCVEITPLCVTLNCTDYRGNDNSTN-----NSNETIVNKEEIKNCSFNITTSLSDKV-Q  
ERALFYMYDITPINN-----TTNTSYKLRTRCNSSVITQACPKVSFEPPIHYCAPAGFAI  
LKCRQKNFNGTGPCTDVSTVQCTHGIRPVVSTQLLNGLSLAEVEVVIKSENF'DNSKNI  
VQLKEAINITCTRPNNNTRKSINI--GPGRAIYATGEIIGDIRQAHNCISEEKWNETLRQ  
IVEKLQKQFG--NKSIIFAQPSGGDPEIVMHSFNCGGEFFYCNTTRLFNSTWSTWNS--ST  
GSNGTGNNITLPCRKQVINMWQKVGKAMYAPPIAGQIRCSSNITGLILTRDGG----S  
NNMSNETFRPGGGNMKNWRSELYKYKVVKIEPLGIAPTAKARRVVQREKRAIG-IGAVF  
LGFLGAAGSTMGAASVTLTVQARQLLFGIVQQNNLLRAIEAQHLLQLTVWGIKQLQAR  
VLAVERYLKDQQLGIWCSGKLICTTAVPWNTSWSNKSLOQIWDNMTWMQWEKEINNYT  
GLIYTLIEQSQNQEKNEQELLELDTWASLWVWFDISKWLWYIKIFIMIVGGLIGLRIVF  
TVLSIVNRVRQGYSPLSFQTRPPAQRG--PDRPEGIEEEGGERDRDRSGPLVDGFFFAI IWV  
DLRNLCLFIYHRLRDLILLIVTRIVELLGR--RGWEILKYWWNLLQYWRQELKNSAISLLNA  
TAIAVAEGTDRVIEVVQIRGRGILHIPVRIRQGLERALL

>V08DA\_POVIp\_2D12.A.3

MRVRGIRKNYQRWVKWG--TLLSMLLGLLMICNAKEQLWVTVVYGVVWKEASTTLFCASD  
ARAYSTEKHNVWATHACVPTDPPDQEVGLGNVTENFNMWKNMVDQMHEDIISLWDQSLK  
PCVEITPLCVTLNCTDYRGND-----NSNETIVNKEEIKNCSFNITTSLSDKV-Q  
ERALFYMYDITPINN-----TTNTSYKLRTRCNSSVITQACPKVSFEPPIHYCAPAGFAI  
LKCRQKNFNGTGPCTDVSTVQCTHGIRPVVSTQLLNGLSLAEVEVVIKSENF'DNSKNI  
VQLKEAINITCTRPNNNTRKSINI--GPGRAIYATGEIIGDIRQAHNCISEEKWNETLRQ  
IVEKLQKQFG--NKSIIFAQPSGGDPEIVMHSFNCGGEFFYCNTTRLFNSTWNS--S  
LSNGTGNNITLPCRKQVINMWQKVGKAMYAPPIAGQIRCSSNITGLILTRDGG----S  
NNMSNETFRPGGGNMKNWRSELYKYKVVKIEPLGIAPTAKARRVVQREKRAIG-IGAVF  
LGFLGAAGSTMGAASVTLTVQARQLLFGIVQQNNLLRAIEAQHLLQLTVWGIKQLQAR  
VLAVERYLKDQQLGIWCSGKLICTTAVPWNTSWSNKSLOQIWDNMTWMQWEKEINNYT  
GLIYTLIEQSQNQEKNEQELLELDTWASLWVWFDISKWLWYIKIFIMIVGGLIGLRIVF  
TVLSIVNRVRQGYSPLSFQTRPPAQRG--PDRPEGIEEEGGERDRDRSGPLVNGFFFAI IWV  
DLRNLCLFIYHRLRDLILLIVTRIVELLGR--RGWEILKYWWNLLQYWRQELKNSAISLLNA  
TAIAVAEGTDRVIEVVQIRGRGILHIPVRIRQGLERALL

>V08DA\_Prap\_2A5.5

MRVRGIRKNYQRLWKWG--TLLSMLLGLLMICNAKEQLWVTVVYGVVWKEASTTLFCASD  
ARAYSTEKHNVWATHACVPTDPPDQEVGLGNVTENFNMWKNMVDQMHEDIISLWDQSLK  
PCVEITPLCVTLNCTDYRGNDNSTN-----NSNETIVNKEEIKNCSFNITTSLSDKV-Q  
ERALFYMYDITPINN-----TTNTSYKLRTRCNSSVITQACPKVSFEPPIHYCAPAGFAI  
LKCRQKNFNGTGPCTDVSTVQCTHGIRPVVSTQLLNGLSLAEVEVVIKSENF'DNSKNI  
VQLKEAINITCTRPNNNTRKSINI--GPGRAIYATGEIIGDIRQAHNCISEEKWNETLRQ  
IVEKLQKQFG--NKSIIFAQPSGGDPEIVMHSFNCGGEFFYCNTTRLFNSTWNS--S  
LSNGTGNNITLPCRKQVINMWQKVGKAMYAPPIAGQIRCSSNITGLILTRDGG----S  
NNMSNETFRPGGGNMKNWRSELYKYKVVKIEPLGIAPTAKARRVVQREKRAIG-IGAVF  
LGFLGAAGSTMGAASVTLTVQARQLLFGIVQQNNLLRAIEAQHLLQLTVWGIKQLQAR  
VLAVERYLKDQQLGIWCSGKLICTTAVPWNTSWSNKSLOQIWDNMTWMQWEKEINNYT  
GLIYTLIEQSQNQEKNEQELLELDTWASLWVWFDISKWLWYIKIFIMIVGGLIGLRIVF  
TVLSIVNRVRQGYSPLSFQTRPPAQRG--PDRPEGIEEEGGERDRDRSGPLVDGFFFAI IWV  
DLRNLCLFIYHRLRDLILLIVTRIVELLGR--RGWEILKYWWNLLQYWRQELKNSAISLLNA



TAI A V A E G T D R V I E V V Q R I G R G I L H I P V R I R Q G L E R A L L  
>V06\_MO\_POVIp\_2D8.7  
M K V K G I R R N Y Q L L W R W --- G I M L L G I L R I C N A T E E L W V T V Y Y G V P V W K E A N T T L F C A S D  
A K Y D T E A H N V W A T H A C V P T D P N P Q E I V L G N V T E N F N M W K N D M V E Q M H E D I I S L W D Q S L K  
P C V K L T P L C V K L N C T D A S T N T N S T T N S T S G G E E R M E K E E I K N C S F K I T T S T R E K V - K  
G S A F F Y K T D V V S I A K --- D N T S Y K L I H C N T S V I T Q A C P K V S F E P I P I H Y C A P A G F A I  
L K C N N K T F N G T G P C K N V S T V L C T H G I K P V V S T Q L L L N G S L A E G E V I R S E N F T N N A K T I I  
V H L N E S V V I N C T R P N N N T R R S I N M -- G P G R A F Y A T - G I I G D I R Q A Y C N I S Q G K W N Y T L K Q  
I V K K L R E Q F G E N K T I V F N Q S S G D P E I V T H S F N C G G E F F Y C N T T K L F N S T W N T S A --- W  
H G Y Q E K N D T I T L P C K I R Q I I N M W Q E V G K A M Y A P P I A G V I R C S S N I T G L L L T R D G G --- N  
E S E G N E I F R P G G G D M R D N W R S E L Y K Y K V V K I E P L G I A P T K A K R R V V Q R E K R A V G - I G A L F  
L G F L G A A G S T M G A A S I T L T G Q A R L L L S G I V Q Q N N L L R A I E A Q Q H L L Q L T V W G I K Q L Q A R  
I L A V E R Y L K D Q Q L L G I W G C S G K L I C T T A V P W N T S W S N K S M D N I W N N M T W M E W E R E I D N Y T  
G I I Y N L L E D S Q Y Q Q E K N E K E L L E L D K W A S L W N W F S I T N W L W Y I K I F I M I V G G L V G L R I V F  
A A F S I I N R V R Q G Y S P L S F Q T R F P A P R G - P D R P E G I E E E G G E R D R D R S G R L V S G F L P L I W D  
D L R N L C L F S Y R R L R D L L L I V T R I V E L L G R - R G W E A L K Y W W N L L Q Y W G Q E L K N S A V S L L N A  
A T I A V A E G T D R I I E V L Q R I F R A I L H I P T R I R Q G L E R A L L

>V06MO\_Prap\_1G3.2\_b  
M K V K G I R R N Y Q L L W R W --- G I M L L G I L M I C N A T E K L W V T V Y Y G V P V W K E A N T T L F C A S D  
A K A Y D T E V H N V W A T H A C V P T D P N P Q E L L E N V T E N F N M W K N D M V E Q M H E D I I S L W D Q S L K  
P C V K L T P L C V K L N C T D A N T S T T N S T T N S T S G G E E R M E K E E I K N C S F N I T T S T Q E K V - K  
G S A F F Y K I D I V P I G N --- D T T N T S Y K L L H C N T S V I T Q A C P K V S F E P I P I H Y C A P A G F A I  
L K C N N E K F N G T G P C K N V S T V L C T H G I K P V V S T Q L L L N G S L A E G E V M I R S E N F T N N A K T I I  
V H L N E S V V I N C T R P N N N T R K S I N M -- G P G R A F Y A T - G I I G D I R Q A H C N I S R T A W N N T L E K  
I V K K L R E Q F G K N K T I V F N Q S S G D P E I V T H S F N C G G E F F Y C N T T K L F N S T W N T S M --- W  
H G S N E Q E E N V T I P C K I R Q I I N M W Q E V G K A M Y A P P I A G V I R C S S E I T G L L L T R D G G --- N E S  
E S E G K E I F R P G G G D M R D N W R S E L Y K Y K V V K I E P L G I A P T K A K R R V V Q R E K R A V G - I G A L F  
L G F L G A A G S T M G A A S I V L T G Q A R L L L S G I V Q Q N N L L R A I E A Q Q H L L Q L T V W G I K Q L Q A R  
V L A V E R Y L K D Q Q L L G I W G C S G K L I C T T A V P W N A S W S N K S Q N E I W N N M T W M E W E R E I D N Y T  
G I I Y N L L E D S Q Y Q Q E K N E K E L L E L D K W A S L W N W F S I T N W L W Y I R I F I M I V G G L V G L R I V F  
A V F S V I N K V R Q G Y S P L S F Q T R F P A P R G - P D R P E G I E E E G G E R D R D R S G R L V N G F L P L I W D  
D L R S L C L F S Y R R L R D L L L I A T R I V E L L G R - R G W E A L K Y W W N L L Q Y W G Q E L K N S A V S L L N A  
A A I A V A E G T D R I I E V L Q R I F R A I L H I P T R I R Q G L E R A L L

>V06\_MO\_POVIp\_1F2.7  
M K V K G I R R N Y Q L L W R W --- G I M L L G I L R I C N A T E E L W V T V Y Y G V P V W K E A N T T L F C A S D  
A K A Y D K E V H N V W A T H A C V P T D P T P Q E I V L G N V T E N F N M W K N D M V E Q M H E D I I S L W D Q S L K  
P C V K L T P L C V K L N C T D A S T T N S T T N S T S G G E E R M E K E E I K N C S F N I T T S T Q E K V - K  
G S A F F Y K I D I V P I G N --- D T T N T S Y R L I H C N T S V I T Q A C P K V S F E P I P I H Y C A P A G F A I  
L K C N N E T F N G T G P C T N V S T V I C T H G I K P V V S T Q L L L N G S L A E G E V M I R S E N F T N N A K T I I  
V H L N E S V V I N C T R P N N N T R K S I N M -- G P G R A F Y A T - G I I G D I R Q A H C N I S R T A W N N T L K K  
I V E K L R E Q F G K N K T I V F N Q S S G D P E I V T H S F N C G G E F F Y C N T T K L F N S T W N T S I --- E  
H G S K D Q E G N I T L P C K I R Q I I N M W Q E V G K A M Y A P P I A G V I R C S S D I T G L L L T R D G G -- N E S  
E S E G K E I F R P G G G D M R D N W R S E L Y K Y K V V K I E P L G I A P T K A K R R V V Q R E K R A V G - I G A L F  
L G F L G A A G S T M G A A S I M L T G Q T R Q L L S G I V Q Q N N L L R A I E A Q Q H L L Q L T V W G I K Q L Q A R  
V L A V E R Y L K D Q Q L L G I W G C S G K L I C T T D V P W N T S W S N K T L D K I W N N M T W M E W E R E I D N Y T  
G I I Y N L L E D S Q Y Q Q E K N E K E L L E L D K W T S L W T W F S I T N W L W Y I R I F I M I V G G L V G L R I V F  
A V I S I I N K V R Q G Y S P L S F Q T R F P A P R G P D R P E G I E E E G G E R D R D R S G R L V N G F L P L I W D  
D L R S L C L F S Y R R L R D L L L I V T R I V E L L G R - R G W E A L K Y W W N L L Q Y W G Q E L K N S A V S L L N A  
A A I A V A E G T D R I I E V L Q R I F R A I L H I P T R I R Q G L E R A L L

>V06\_MO\_Prap\_1E2.6  
M K V K G I R R N Y Q L L W K W --- G I M L L G I L M I C N A T E K L W V T V Y Y G V P V W K E A N T T L F C A S D  
A R A Y D K E V H N V W A T H A C V P T D P N P Q E V L G N V T E N F N M W K N D M V E Q M H E D I I S L W D Q S L K  
P C V K L T P L C V K L N C T N A S T N T N S T T N S T S D D K E R M E K E E I K N C S F N I T T S T Q E K V - K  
G S A F F Y K I D I V P M G N --- D T T N T S Y R L I H C N T S V I T Q A C P K V S F E P I P I H Y C A P A G F A I  
L K C N N E T F N G T G P C K N V S T V L C T H G I K P V V S T Q L L L N G S L A E G E V M I R S E N F T N N A K T I I  
V H L N E A V V I N C T R P N N N T R R S I N M -- G P G R A F Y A T - G I I G D I R Q A H C N I S R T A W N D T L K K  
I V K K L R E Q F G - N K T I V F N Q S S G D P E I V T H S F N C G G E F F Y C N T T K L F S S T W N T S T --- W  
H E S N D Q G E N I T L P C K I R Q I I N M W Q E V G K A M Y A P P I A G V I R C S S N I T G L L L T R D G G --- N  
G S E G K E I F R P G G G D M R D N W R S E L Y K Y K V V K I E P L G I A P T K A K R R V V Q R E K R A V G - I G A L F  
L G F L G A A G S T M G A A S I M L T G Q T R L L L S G I V Q Q N N L L R A I E A Q Q H L L Q L T V W G I K Q L Q A R  
V L A V E R Y L K D Q Q L L G I W G C S G K L I C T T D V P W D T N W S N K T L D K I W N N M T W M E W E R E I D N Y T  
G I I Y N L L E S Q Y Q Q E K N E K E L L E L D K W A S L W N W F S I T N W L W Y I R I F I M I V G G L V G L R I V F  
T V L S I I N R V R Q G Y S P L S F Q T R F P A P R G P D R P E E I E E E G G E R D R D R S G R L V N G F L P L I W D  
D L R S L C L F S Y R R L R D L L L I V T R I V E L L G R - R G W E A L K Y W W N L L Q Y W G Q E L K N S A V S L L N A  
A A I A V A E G T D R I I E V L Q R I F R A I L H I P T R I R Q G L E R A L L

>V04EB\_Prap\_1H5.6  
M K I K E T R K N Y Q H F W K W --- G T M L L G M L L I C S A A E Q L W V T V Y Y G V P V W K E A T T L F C A S D  
A K A Y D T E A H N V W A T H A C V P T D P N P Q E V V L G N V T E N F N A W K N N M V E Q M H E D V I S L W D Q S L K  
P C V K L T P L C V T L N C T D W K N P T N N T N T - D T N A T V N R E E L G E I K N C S F N I T T S M R D K M Q K  
A Y A P F Y K L D V E P I D N --- N N T S Y R L I S C N T S V I T Q A C P K M S F E P I P I H Y C A P A G F A I  
L K C N N K T F N G K G P C T N V S T V Q C T H G I K P V V S T Q L L L N G S L A E K E V V I R S E N F T D N A K V I T  
V H L N D S V G I N C T R P N N N T R K S I Q I -- G P G R A F E T G G I I G N I R Q A H C N I S Q K Q W N T T L G Q  
I V K K L R E Q Y G S N K T I V F N Q S S G D P E I V M H S F N C G G E F F Y C N T T P L F N S T W N G T N G -- T W

KGTNGTNGTITIQCRKQFINMWQGVGKAMYAPPISGIRCSSNITGLLLTRDGG---N  
ETSGTEIFRPAGNMKDNWRSELYKYVVKIEPLGVAPTKAKRRVVQREKRAVGTIGAMF  
LGFPGAAGSTMGAASMTLTVQARLLLSGIVQQNNLLRAIEAQHLLQLTVWGIKQLQAR  
VLAVERFLRDQQLLGIWGC SGKLICTTTPVWNASWSNKS LDMIWHNMTWMQWEREIDNYT  
QLIYTLIEESQSQEKEQELLELDK WASLWNWFSITQWLWYIKIFIMIVAGLVGLRIVF  
AVLSIVNRVRQGYSPLSFQTRLPTPRG-PDRPEETEEEGGDRDRDRSVRLVNGFLAL IWD  
DLRSLCLFSYHHLRDL LLLIAARIVELLGR-RGWEALKYWWNLLQYWIQELKNSAVSLLNA  
TAIAVAEGTDRIIEVVQRACR-----ANRA--

>V04EB\_POVIp\_2A8.4

MKIKETRKNYQHFWKW---GTMLLGMLLICSAAEQLVVTVYVYVGPVWKEATTLFCASD  
AKAYDTEAHNVWATHACVPTDPNPQEVVLGNVTENFNWAKNNMVEQM HEDVISLWDQSLK  
PCVKLTPLCVTLNCTDWNKPTNNTNTT-DTNTTIVNREELGEIKNCSFNITTSMRDKMQK  
AYAPFYKLDVEPIDN-----NNTSYRLISCN TSVITQACP KMSFEP IPIHYCAPAGFAI  
LKCNNKTFNGKGPCTNVSTVQCTHGIKPVVSTQLLNGSLAEKEVVIRSENFTDNAK VIT  
VHLNDSVGINCTRPNNNTRKSIQI--GPGRAFFETGGIIGNIRQAHCNISQKHWN TTLGQ  
IVVKLREQYGSNKTIVFNQSSGDPEIVMHSFNCGGEFFYCNTPLFNSTWNGTNG--TW  
KGTNGTNGTITIQCRKQFINMWQGVGKAMYAPPISGIRCSSNITGLLLTRDGG---N  
ETSGTEIFRPAGNMKDNWRSELYKYVVKIEPLGVAPTKAKRRVVQREKRAVGTIGAMF  
LGFPGAAGSTMGAASMTLTVQARLLLSGIVQQNNLLRAIEAQHLLQLTVWGIKQLQAR  
VLAVERFLRDQQLLGIWGC SGKLICTTTPVWNASWSNKS LDMIWHNMTWMQWEREIDNYT  
QLIYTLIEESQSQEKEQELLELDK WASLWNWFSITQWLWYIKIFIMIVAGLVGLRIVF  
AVLSIVNRVRQGYSPLSFQTRLPTPRG-PDRPEETEEEGGDRDRDRSVRLVNGFLAL IWD  
DLRSLCLFSYHHLRDL LLLIAARIVELLGR-RGWEALKYWWNLLQYWIQELKNSAVSLLNA  
TAIAVAEGTDRIIEVVQRACR-----ANRA--

>V04EB\_POVIp\_1D1.1

MKIKETRKNYQHFWKW---GTMLLGMLLICSAAEQLVVTVYVYVGPVWKEATTLFCASD  
AKAYDTEAHNVWATHACVPTDPNPQEVVLGNVTENFNWAKNNMVEQM HEDVISLWDQSLK  
PCVKLTPLCVTLNCTDWNKPTNNTNTT-DT NATTVNREELGEIKNCSFNITTSMRDKMQK  
AYAPFYKLDVEPIDN-----NNTSYRLISCN TSVITQACP KMSFEP IPIHYCAPAGFAI  
LKCNNKTFNGKGPCTNVSTVQCTHGIKPVVSTQLLNGSLAEKEVVIRSENFTDNAK VIT  
VHLNDSVGINCTRPNNNTRKSIQI--GPGRAFFETGGIIGNIRQAHCNISQKQWNTTLGQ  
IVVKLREQYGSNKTIVFNQSSGDPEIVMHSFNCGGEFFYCNTPLFNSTWNGTNG--TW  
KGTNGTNGTITIQCRKQFINMWQGVGKAMYAPPISGIRCSSYITGLLLTRDGG---N  
ETSGTEIFRPAGNMKDNWRSELYKYVVKIEPLGVAPTKAKRRVVQREKRAVGTIGAMS  
LGFPGAAGSTMGAASMTLTVQARLLLSGIVQQNNLLRAIEAQHLLQLTVWGIKQLQAR  
VLAVERFLRDQQLLGIWGC SGKLICTTTPVWNASWSNKS LDMIWHNMTWMQWEREIDNYT  
QLIYTLIEESQSQEKEQELLELDK WASLWNWFSITQWLWYIKIFIMIVAGLVGLRIVF  
AVLSIVNRVRQGYSPLSFQTRLPTPRG-PDRPEETEEEGGDRDRDRSVRLVNGFLAL IWD  
DLRSLCLFSYHHLRDL LLLIAARIVELLGR-RGWEALKYWWNLLQYWIQELKNSAVSLLNA  
TAIAVAEGTDRIIEVVQRACR-----ANRA--

>V04EB\_POVIp\_1F8.7

MKIKETRKNYQHFWKW---GTMLLGMLLICSAAEQLVVTVYVYVGPVWKEATTLFCASD  
AKAYDTEAHNVWATHACVPTDPNPQEVVLGNVTENFNWAKNNMVEQM HEDVISLWDQSLK  
PCVKLTPLCVTLNCTDWNKPTNNTNTT-DT NATTVNREELGEIKNCSFNITTSMRDKMQK  
AYAPFYKLDVEPIDN-----NNTSYRLISCN TSVITQACP KMSFEP IPIHYCAPAGFAI  
LKCNNKTFNGKGPCTNVSTVQCTHGIKPVVSTQLLNGSLAEKEVVIRSENFTDNAK VIT  
VHLNDSVGINCTRPNNNTRKSIQI--GPGRAFFETGGIIGNIRQAHCNISQKQWNTTLGQ  
IVVKLREQYGSNKTIVFNQSSGDPEIVMHSFNCGGEFFYCNTPLFNSTWNGTNG--TW  
KGTNGTNGTITIQCRKQFINMWQGVGKAMYAPPISGIRCSSNITGLLLTRDGG---N  
ETSGTEIFRPAGNMKDNWRSELYKYVVKIEPLGVAPTKAKRRVVQREKRAVGTIGAMF  
LGFPGAAGSTMGAASMTLTVQARLLLSGIVQQNNLLRAIEAQHLLQLTVWGIKQLQAR  
VLAVERFLRDQQLLGIWGC SGKLICTTTPVWNASWSNKS LDMIWHNMTWMQWEREIDNYT  
QLIYTLIEESQSQEKEQELLELDK WASLWNWFSITQWLWYIKIFIMIVAGLVGLRIVF  
AVLSIVNRVRQGYSPLSFQTRLPTPRG-PDRPEETEEEGGDRDRDRSVRLVNGFLAL IWD  
DLRSLCLFSYHHLRDL LLLIAARIVELLGR-RGWEALKYWWNLLQYWIQELKNSAVSLLNA  
TAIAVAEGTDRIIEVVQRACR-----ANRA--

>V04EB\_POVIp\_1G4.5

MKIKETRKNYQHFWKW---GTMLLGMLLICSAAEQLVVTVYVYVGPVWKEATTLFCASD  
AKAYDTEAHNVWATHACVPTDPNPQEVVLGNVTENFNWAKNNMVEQM HEDVISLWDQSLK  
PCVKLTPLCVTLNCTDWNKPTNNTNTT-DT NATTVNREELGEIKNCSFNITTSMRDKMQK  
AYAPFYKLDVEPIDN-----NNTSYRLISCN TSVITQACP KMSFEP IPIHYCAPAGFAI  
LKCNNKTFNGKGPCTNVSTVQCTHGIKPVVSTQLLNGSLAEKEVVIRSENFTDNAK VIT  
VHLNDSVGINCTRPNNNTRKSIQI--GPGRAFFETGGIIGNIRQAHCNISQKQWNTTLGQ  
IVVKLREQYGSNKTIVFNQSSGDPEIVMHSFNCGGEFFYCNTPLFNSTWNGTNG--TW  
KGTNGTNGTITIQCRKQFINMWQGVGKAMYAPPISGIRCSSNITGLLLTRDGG---N  
ETSGTEIFRPAGNMKDNWRSELYKYVVKIEPLGVAPTKAKRRVVQREKRAVGTIGAMF  
LGFPGAAGSTMGAASMTLTVQARLLLSGIVQQNNLLRAIEAQHLLQLTVWGIKQLQAR  
VLAVERFLRDQQLLGIWGC SGKLICTTTPVWNASWSNKS LDMIWHNMTWMQWEREIDNYT  
QLIYTLIEESQSQEKEQELLELDK WASLWNWFSITQWLWYIKIFIMIVAGLVGLRIVF  
AVLSIVNRVRQGYSPLSFQTRLPTPRG-PDRPEETEEEGGDRDRDRSVRLVNGFLAL IWD  
DLRSLCLFSYHHLRDL LLLIAARIVELLGR-RGWEALKYWWNLLQYWIQELKNSAVSLLNA  
TAIAVAEGTDRIIEVVQRACR-----ANRA--

>V04EB\_PRAP\_2D9.5

MKIKETRKNYQHFWKW----GTMLLGMLLICSAAEQWVTVVYGVVPVWKEATTLFCASD  
AKAYDTEAHNVWATHACVPTDNPQEVVLGNVTENFNWKNMVEQMHEVDVLSLWDQSLK  
PCVKLTPLCVTLNCTDWNPTNNTNTT--DTNATTVNREELGEIKNCSFNITTSMRDKMQK  
AYAPFYKLDVEPIDN-----NNTSYRLISCNTSVITQACPKMSFEP IPIHYCAPAGFAI  
LKCNNKTFNGKGPCTNVSTVQCTHGKIPVSTQLLNGLSLAEKEVVIRSENFDTNAKVI  
VHLNDSVGINCTRPNNNRKSIQI--GPGRAFFETGGIIGNIRQAHCNISQKQWNTTLGQ  
IVVKLREQYGSNKTI VFNQSSGGDPEIVMHSFNCGGEFFYCNTTPLFNSTWNGTNG--TW  
KGTNGTNGTITIQCRKQFINMWQGVGKAMYAPPISGIRCSSNITGLLLTRDGG---N  
ETSGTEIFRPAGGNMKNRSELYKYKVVKIEPLGVAPTAKARRVVQREKRAVGTIGAMF  
LGFLGAAGSTMGAASMTLTVQARLLLSGIVQQNNLLRAIEAQHLLQLTVVWGIKQLQAR  
VLAVERFLRDQQLLGIWGC SGKLICTTTPWNASWSNKS LDMIWHNM TWMQWEREIDNYT  
QLIYTLIEESQNOQEKNEQELLELDK WASLWNWFSITQWLWYIKTFIMIVAGLVGLRIVF  
AVLSIVNRVRQGYSPLSFQTRLPTRG--PDRPEETEEEGGDRDRDRSVRLVNGFLAL IWD  
DLRSLCLFSYHHLRDL LLI AARIVELLGR--RGWEALKYWWNLLQYWIQELKNSAVSLLNA  
TAIAVAEGTDRIIEVVQRACR-----ANRA--

>V04EB\_Prap\_2A10.7

MKIKETRKNYQHFWKW----GTMLLGMLLICSAAEQWVTVVYGVVPVWKEATTLFCASD  
AKAYDTEAHNVWATHACVPTDNPQEVVLGNVTENFNWKNMVEQMHEVDVLSLWDQSLK  
PCVKLTPLCVTLNCTDWNPTNNTNTT--DTNATTVNREELGEIKNCSFNITTSMRDKMQK  
AYAPFYKLDVEPIDN-----NNTSYRLISCNTSVITQACPKMSFEP IPIHYCAPAGFAI  
LKCNNKTFNGKGPCTNVSTVQCTHGKIPVSTQLLNGLSLAEKEVVIRSENFDTNAKVI  
VHLNDSVGINCTRPNNNRKSIQI--GPGRAFFETGGIIGNIRQAHCNISQKQWNTTLGQ  
IVVKLREQYGSNKTI VFNQSSGGDPEIVMHSFNCGGEFFYCNTTPLFNSTWNGTNG--TW  
KGTNGTNGTITIQCRKQFINMWQGVGKAMYAPPISGIRCSSNITGLLLTRDGG---N  
ETSGTEIFRPAGGNMKNRSELYKYKVVKIEPLGVAPTAKARRVVQREKRAVGTIGAMF  
LGFLGAAGSTMGAASMTLTVQARLLLSGIVQQNNLLRAIEAQHLLQLTVVWGIKQLQAR  
VLAVERFLRDQQLLGIWGC SGKLICTTTPWNASWSNKS LDMIWHNM TWMQWEREIDNYT  
QLIYTLIEESQNOQEKNEQELLELDK WASLWNWFSITQWLWYIKTFIMIVAGLVGLRIVF  
AVLSIVNRVRQGYSPLSFQTRLPTRG--PDRPEETEEEGGDRDRDRSVRLVNGFLAL IWD  
DLRSLCLFSYHHLRDL LLI AARIVELLGR--RGWEALKYWWNLLQYWIQELKNSAVSLLNA  
TAIAVAEGTDRIIEVVQRACR-----ANRA--

>V04EB\_Prap\_2C10.1

MKIKETRKNYQHFWKW----GTMLLGMLLICSAAEQWVTVVYGVVPVWKEATTLFCASD  
AKAYDTEAHNVWATHACVPTDNPQEVVLGNVTENFNWKNMVEQMHEVDVLSLWDQSLK  
PCVKLTPLCVTLNCTDWNPTNNTNTT--DTNATTVNREELGEIKNCSFNITTSMRDKMQK  
AYAPFYKLDVEPIDN-----NNTSYRLISCNTSVITQACPKMSFEP IPIHYCAPAGFAI  
LKCNNKTFNGKGPCTNVSTVQCTHGKIPVSTQLLNGLSLAEKEVVIRSENFDTNAKVI  
VHLNDSVGINCTRPNNNRKSIQI--GPGRAFFETGGIIGNIRQAHCNISQKQWNTTLGQ  
IVVKLREQYGSNKTI VFNQSSGGDPEIVMHSFNCGGEFFYCNTTPLFNSTWNGTNG--TW  
KGTNGTNGTITIQCRKQFINMWQGVGKAMYAPPISGIRCSSNITGLLLTRDGG---N  
ETSGTEIFRPAGGNMKNRSELYKYKVVKIEPLGVAPTAKARRVVQREKRAVGTIGAMF  
LGFLGAAGSTMGAASMTLTVQARLLLSGIVQQNNLLRAIEAQHLLQLTVVWGIKQLQAR  
VLAVERFLRDQQLLGIWGC SGKLICTTTPWNASWSNKS LDMIWHNM TWMQWEREIDNYT  
QLIYTLIEESQNOQEKNEQELLELDK WASLWNWFSITQWLWYIKTFIMIVAGLVGLRIVF  
AALSIVNRVRQGYSPLSFQTRLPTRG--PDRPEETEEEGGDRDRDRSVRLVNGFLAL IWD  
DLRSLCLFSYHHLRDL LLI AARIVELLGR--RGWEALKYWWNLLQYWIQELKNSAVSLLNA  
TAIAVAEGTDRIIEVVQRACR-----ANRA--

>V02\_RP\_Prap\_2A12.3

MRVREIRRNSRQFWKW----GIMLLGMLMICSAAEQWVTVVYGVVPVWKDANTTLFCASD  
AKAYDTEVHNVWATHACVPTDNPQEVVLENTENFNWKNMVDQMHEDIISLWDQSLK  
PCVKLTPLCVTLNCTDLNATNTTSN---DTSNGGMPPEGGEMKNCSFNITTSVRDKMQK  
TYALFYKLDVEPING-----DNTSYRLISCNTSVITQACPKVTFEP IPIHYCAPAGFAI  
LKCNDKKFNCTGQCRNVSTVQCTHGKIPVSTQLLNGLSLAEKEVVIRSVNLTNNAKTI I  
VQLKEAVQINCTRPNNNRKGIHI--GPGRAFATGSIIGNIRQAYCNLSSTKWHNTLQO  
IVKKLREQFG--NKTIIFNQSSGGDPEIVMHSFNCGGEFFYCNTQLFNSTWTNST-----  
EGLNTEDEPITLPCRIKQIINLWQEVGKAMYAPPISGIISSSNITGLLLTRDGG--KNG  
SANNTEIFRPEGGDMRDNRSELYKYKVVKIEPLGIAPTAKARRVVQREKRAVG--LGAMF  
LGFLGAAGSTMGAAAITLTVQARQLLSGIVQQNNLLRAIEAQHMLQLTVVWGIKQLQAR  
VLAVERYLKDQQLLGIWGC SGKLICTTAVPWNWSNSRSLK IWDNM TWMQWEREIDNYT  
GLIYSLIEESQNOQEKNEQELLELDK WASLWNWFSITQWLWYIKTFIMIVAGLVGLRIVF  
AVFSIVNRVRQGYSPLSFQTLTPAPRG--PDRPEGIEEEGGERDRDRSGRLVTGFLAL IWD  
DLRSLCLFSYHHLRDL LLI VARI VELLGR--RGWEALKYWWNLLKYWSQELKSSAISLLNV  
TAIAVAEGTDRIIEVQLRICRAFNRIPRRIRQGLERILI

>V02\_POVIp\_2D4.2

MRVREIRKSSRQFWKW----GIMLLGMLMICSAAEQWVTVVYGVVPVWKDANTTLFCASD  
AKAYDTEVHNVWATHACVPTDNPQEVVLENTENFNWKNMVDQMHEDIISLWDQSLK  
PCVKLTPLCVTLNCTDLNATNTTSN---GTSNGGMPPEGGEIKNCSFNITTSVRDKMQK  
TYALFYKLDVEPING-----DNTSYRLISCNTSVITQACPKVTFEP IPIHYCAPAGFAI  
LKCNDKKFNCTGQCRNVSTVQCTHGKIPVSTQLLNGLSLAEKEVVIRSVNLTNNAKTI I  
VQLKEAVQINCTRPNNNRKGIHI--GPGRAFATGDIIGNIRQAHCNLSSTKWNNTLQO  
IVKKLREQFG--NKTIIFNQSSGGDPEIVMHTFNCGGEFFYCNTKLFNSTWNSTE-----  
ELNTEGPPITLPCRIKQIINLWQEVGKAMYAPPISGIISSSNITGLLLTRDGG---N  
GSETNETFRPGGNMRDNRSELYKYKVVKIEPLGIAPTAKARRVVQREKRAVG--LGAMF

LGFLGAAGSTMGAAAITLTGQARQLLSGIVQQNNLLRAIEAQHMLQLTVVWGIKQLQAR  
VLAVERYLKDQQLLGIWGCSSGKLICTTAVPWNTSWSNRSLEKIWNMTWMEWEREIDNYT  
GLIYSLIEESQOQEKNEQELLELDKWASLWNNFNITQWLWYIKIFIMIVGGLVGLRIVF  
AVFSIVNRVRQGYSPLSFQTLTPAPRG-PDRPEGIEEGGERDRDRSGRLVTGFLALIW  
DLRSLCLFSYHRLRDLILLIVARIVELLGR-RGWEALKYWWNLLKYWSQELKSSAISLLNV  
TAIAVAEGTDRIEVLQRTCRAFNLNIPRRIRQGLERILI

>V02RP\_POVIp\_1A5.8\_2

MRVREIRKSSRQFWK----GIMLLGMLMICSAREQLWVTVVYGVVWKEANTTLFCASD  
AKAYDTEHNVWATHACVPTDNPQEVILENVTFENFMWKNMVDQMHEDIISLWDQSLK  
PCVKLTPLCVTLTDLKNTNTTSN--GTSNGGMPGEGEMKNCSFNITTSVRDKMQK  
TYALFYKLDVEPING-----DNYSYRLISCNSTSVITQACPKVTFEPIPIHYCAPAGFAI  
LKCNDKFKNGTQCRNVSTVQCTHGIKPVVSTQLLNGLSLAEEEVVIRSVNLTDNAKTI  
VQLKEAVQINCTRPNNNTRKGIHI--GPGRAFYATGDIIGNIRQAHCNLSSTKWNNTLKQ  
IVKLLREQFG-NKTIIFNQSSGGDPEIVMHTFNCGGEFFYCNSSTKLFNSTWNSTE----  
ELNTEGPPITLPCRIKQIINLWQEVGKAMYAPPISGIISSSNITGLLLTRDGG----N  
GSETNETFRPGGNMRDNWRSELYKYKVVKIEPLGIAPTAKARRVVQREKRAVG-LGAMF  
LGFLGAAGSTMGAAAITLTGQARQLLSGIVQQNNLLRAIEAQHMLQLTVVWGIKQLQAR  
VLAVERYLKDQQLLGIWGCSSGKLICTTAVPWNTSWSNRSLEKIWNMTWMEWEREIDNYT  
GLIYSLIEESQOQEKNEQELLELDKWASLWNNFNITQWLWYIKIFIMIVGGLVGLRIVF  
AVFSIVNRVRQGYSPLSFQTLTPAPRG-PDRPEGIEEGGERDRDRSGRLVTGFLALIW  
DLRSLCLFSYHRLRDLILLIVARIVELLGR-RGWEALKYWWNLLKYWSQELKSSAISLLNV  
TAIAVAEGTDRIEVLQRTCRAFNLNIPRRIRQGLERILI

>V09JF\_PRAp-2A11.4

MKAKEIRKNCQRLWRW----GILLGMLMICSATEKLWVTVVYGVVWKEANTTLFCASD  
AKAYDTEAHNVWATHACVPTDNPQEVVLANVTENFMWKNMVEQMHQDIISLWDQSLK  
PCVKLTPLCVTLNCTNLNNTNNSSETNANNSSGDYGEIKNCSFNITTPIRNKVQK  
EYALFNRLDIVPIDD-----DNASYTLISCNSTSVITQACPKISFDPPIHYCAPAGFAI  
LKCNNKTFNGTGPCTNVSTVQCTHGIKPVVSTQLLNGLSLAEKETVIRSENFNTNAKTI  
VQLNEPIPICTRPNNNTRKSIHI--APGRAFYATGTIIGNIRQAHCNISNTTWNALNK  
VAKLREQFG-NKTIIFNQSSGGDPEITMHTFNCGGEFFYCDTRLFNSTWGFNDT---S  
DRANSTNSNITLPCRIKQIINRWQEVGRAMYAPPPIRGQIRCSNITGLLLTRDGGNETEE  
NKTTTETFRPGGNMRDNWRSELYKYKVVKIEPLGVAPTAKARRVVQREKRAVG-LGAMF  
LGFLGAAGSTMGAASITLTVQARQLLSGIVQQNNLLRAIEAQHMLQLTVVWGIKQLQAR  
VLAVERYLKDQQLLGLWGCSSGKLICTTAVPWNTSWSNRSQTEIWNMTWMEWEREINNYT  
KVIYTLIEESQOQEKNEQDLELDTWAGLWNNFDTITNWLWYIKIFIMIVGGLIGLRIVF  
TVLSIVNRVRQGYSPLSLQTLFPGRG-PDRPEGIEEGGERDRNGSRTLHGFALVWV  
DLRSLCLFSYHRLRDLILLIVTRTVELLGR-RGWEALKYWWNLLQYWSQELRSSAVSLLNA  
TAIAVAEGTDRIEIVQACRAILHIPPRIQGAERLLL

>V09JF\_POVIp-1D4.2

MKAKEIRKNCQRLWRW----GVLLGMLMICSATEKLWVTVVYGVVWKEANTTLFCASD  
AKAYDTEAHNVWATHACVPTDNPQEVVLANVTENFMWKNMVEQMHQDIISLWDQSLK  
PCVKLTPLCVTLNCTNLNNTNNS-SSGDYGEIKGEIKNCSFNITTPIRNKVQK  
EYALFNRLDIVPIDD-----DNASYTLISCNSTSVITQACPKISFEPPIHYCAPAGFAI  
LKCNNKTFNGTGPCTNVSTVQCTHGIKPVVSTQLLNGLSLAEKETVIRSENFNTNAKTI  
VQLNESIPIDCIRPNNNTRKSIHI--APGRAFYATGTIIGDIRQAYCINISNTTWNALNK  
IVTKLREQFG-NKTIIFNKSSGGDPEITMHTFNCGGEFFYCDTGLFNSTWGFNDT---S  
DWAKSTDSNITLPCRIKQIINRWQEVGRAMYAPPPIRGQIRCSNITGLLLTRDGGNETEE  
NKTTTETFRPGGNMRDNWRSELYKYKVVKIEPLGVAPTQAKARRVVQREKRAVG-LGAMF  
LGFLGAAGSTMGAASITLTVQARQLLSGIVQQNNLLRAIEAQHMLQLTVVWGIKQLQAR  
VLAVERYLKDQQLLGLWGCSSGKLICTTAVPWNTSWSNRSQKEIWNMTWMEWEREINNYT  
KVIYTLIEESQOQEKNEQELLALDTWASLWNNFDTITKWLWYIKIFIMIVGGLIGLRIVF  
TVLSIVNRVRQGYSPLSLQTLFPGRG-PDRPEGIEEGGERDRNGSRTLHGFALVWV  
DLRSLCLFSYHRLRDLILLIVTRTVELLGR-RGWEALKYWWNLLQYWSQELRNSAVSLLNA  
TAIAVAEGTDRIEIVQACRAILHIPPRIQGAERLLL

>V09F\_PRAp-2F9.2

MKAKEIRKNCQRLWRW----GILLGMLMICSATEKLWVTVVYGVVWKEANTTLFCASD  
AKAYDTEAHNVWATHACVPTDNPQEVVLANVTENFMWKNMVEQMHQDIISLWDQSLK  
PCVKLTPLCVTLNCTNLNNTNNSR-ETSNANSSGDYGEIKNCSFNITTPIRNKVQK  
EYALFNRLDIVPIDD-----DNASYTLISCNSTSVITQACPKISFDPPIHYCAPAGFAI  
LKCNNKTFNGTGPCTNVSTVQCTHGIKPVVSTQLLNGLSLAEKEIIRSENFNTNAKTI  
VQLNESIPINCI RPNNNTRKSIHI--APGRAFYATGTIIGNIRQAHCNISNTTWNALNK  
IVTKLREQFG-NKIIFNQSSGGDPEITMHTFNCGGEFFYCDTRLFNSTWGFNDT---S  
DQANSTNINITLPCRIKQIINRWQEVGRAMYAPPPIRGQIRCSNITGLLLTRDGGNETEE  
NKTTTETFRPGGNMRDNWRSELYKYKVVKIEPLGVAPTQAKARRVVQREKRAVG-LGAMF  
LGFLGAAGSTMGAASITLTVQARQLLSGIVQQNNLLRAIEAQHMLQLTVVWGIKQLQAR  
VLAVERYLKDQQLLGLWGCSSGKLICTTAVPWNTSWSNRSQTEIWNMTWMEWEREINNYT  
KVIYTLIEESQOQEKNEQELLALDTWASLWNNFDTITKWLWYIKIFITIVGGLIGLRIVF  
TVLSIVNRVRQGYSPLSLQTLFPGRG-PDRPEGIEEGGERDRNGSRTLHGFALVWV  
DLRSLCLFSYHRLRDLILLIVTRTVELLGR-RGWEALKYWWNLLQYWSQELKNSAISLLNA  
TAIAVAEGTDRIEIVQACRAILHIPPRIQGAERLLL

>V03NP\_POVIp-2D5.10.2

MRVIRKKNYQHWWGWS-TMLTMLLGLMICKAAEQWVTVVYGVVWKEANTTLFCASD  
AKAYDTEHNVWATHACVPTDNPQEVVLENVTFENFMWENNMVEQMHEDIISLWDQSLK

PCVKLTPLCVTLNCTNANISSNTSN-----IYNSSYKPGDIKNCNFNITTHIRDKVKK  
EYALFYALDVIPIDPTVGNKTTTDDYRLISCNSTSVVTQACPKVSFEPIPIHYCAPAGFAI  
LKCNDKMFNGTGPKNVSTIQCTHGIRPVVSTQLLLNGSLAEEDIVIRSKNFDTNAKTII  
VQLNKTVTINCTRPSNNTRKSIHI--APGRAFYATGNIIGDIRQAHCNLSRKDWNSTLRL  
IANKLREQFG-NKTIVFNSSSGDPEIVMHSFNCRGEFFYCNTPLFNSTWYSNN-----T  
QEGMEGNSIITLQCRIKQIVNMWQEVGKAMYAPPIKQIRCSSNITGLLLTRDGG----N  
TTNRPEVFRPGGNMKDNWRSELYKYVVKLEPLGVAPTAKARRVVQREKRAVG-IGALF  
LGFLGAAGSTMGAASMTLTVQARQLLSGIVQQNLLMAIEAQHMLQLTVWGIKQLQAR  
VLAVESYLKDQQLLGIWGC SGKLICTTVPWNTSWSNKTYNEIWDNMTWMQWEKEIDNHT  
SLIYTLIEESQNOQEKNELDLLALDKWANLWSWFNITNWLWYIKIFIMIVGGLVGLRIVF  
TVLSIVNRVRQYSPLSFQTHLPARRG-PDRPEEIEEEGGERDRGRSEPLVTGFLTLIIV  
DLRSLCLFSYHRLRDLLLIAARIVELLGR-RGWEILKYWWNLLQYWSQELKNSAVSLLNA  
TAIAVAEGTDRVIEIVQIGIRAILHIPARIRQGLERVLL
